# Supplementary material
Source: PubMed Central journal article supplement (PMC6738865)
Supplement: jin-0009-0343-s02.pdf [file jin-0009-0343-s02.pdf]

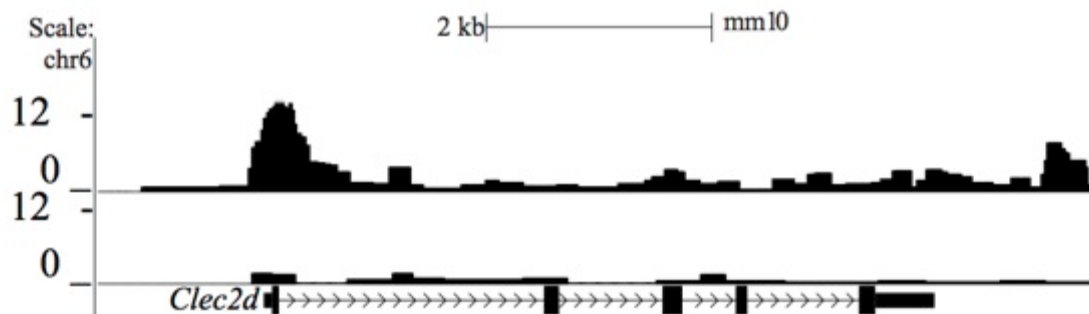

**Supp. Fig. 1.** Herpes simplex virus (HSV)-1 infected MEF cells have reduced RNA Polymerase II (RNAPII) occupancy at the *Clec2d* promoter. RNAPII ChIP-seq data from Mock (GSM1623231) and 4hr HSV-1 infected (GSM1623232) MEF cells were mapped onto the mouse genome (mm10 assembly) on UCSC genome browser. GEO Series accession number GSE66487. Experiments were performed by Abrisch *et al.*, 2015.

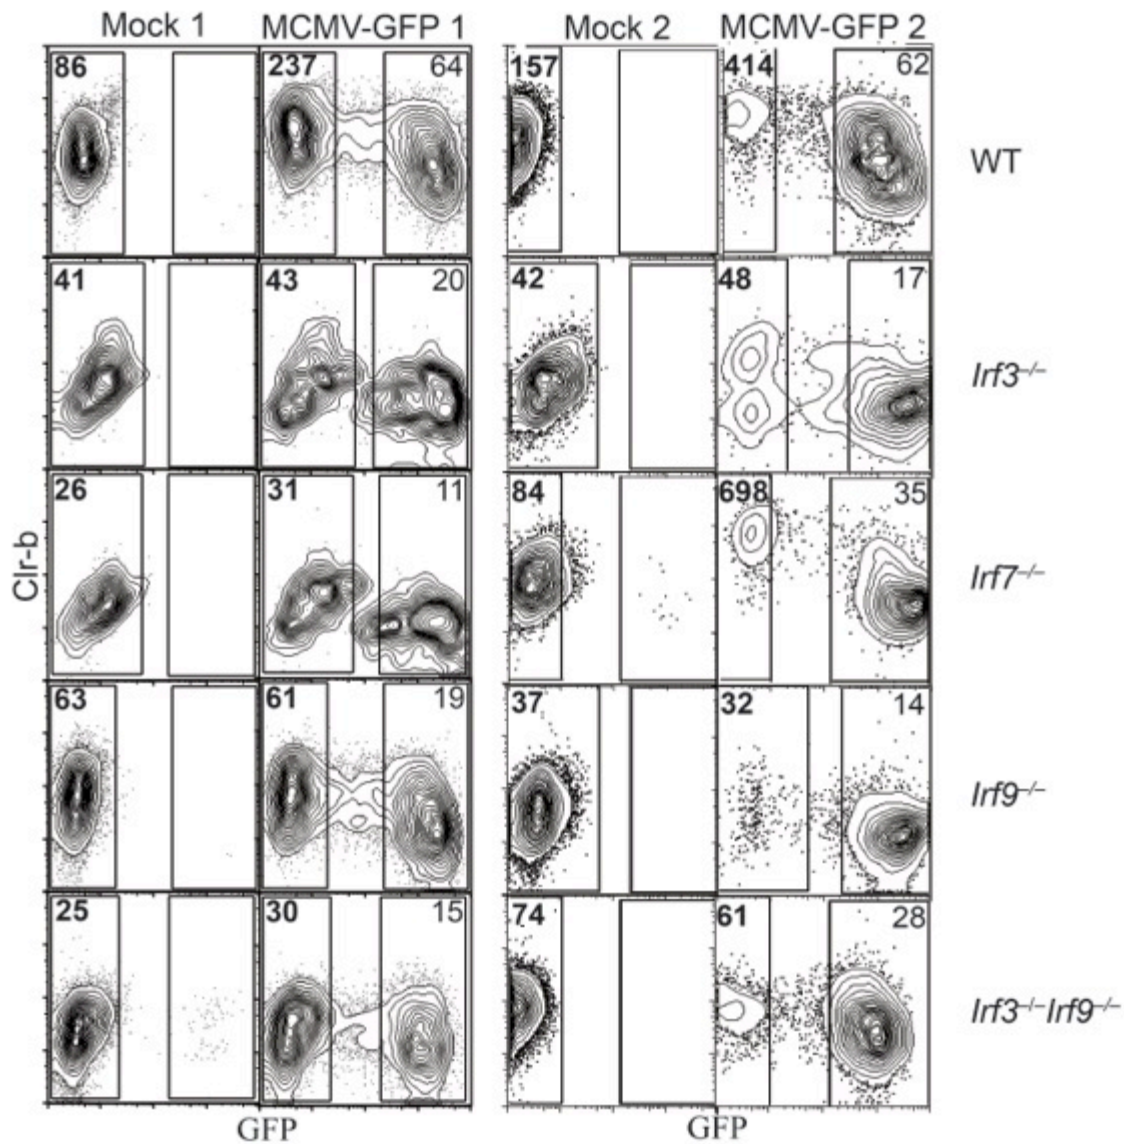

**Supp. Fig. 2.** Expression of Clr-b on MEF cells during viral infection. MEF cells were seeded and infected with MCMV-GFP at an MOI of 1 (MCMV-GFP 1) or 3 (MCMV-GFP 2). Clr-b expression was analyzed by flow cytometry 18 h.p.i.. Cells were gated based on forward and side scatter and lack of propidium iodide staining. Numbers at the top of the gates represent the MFI.

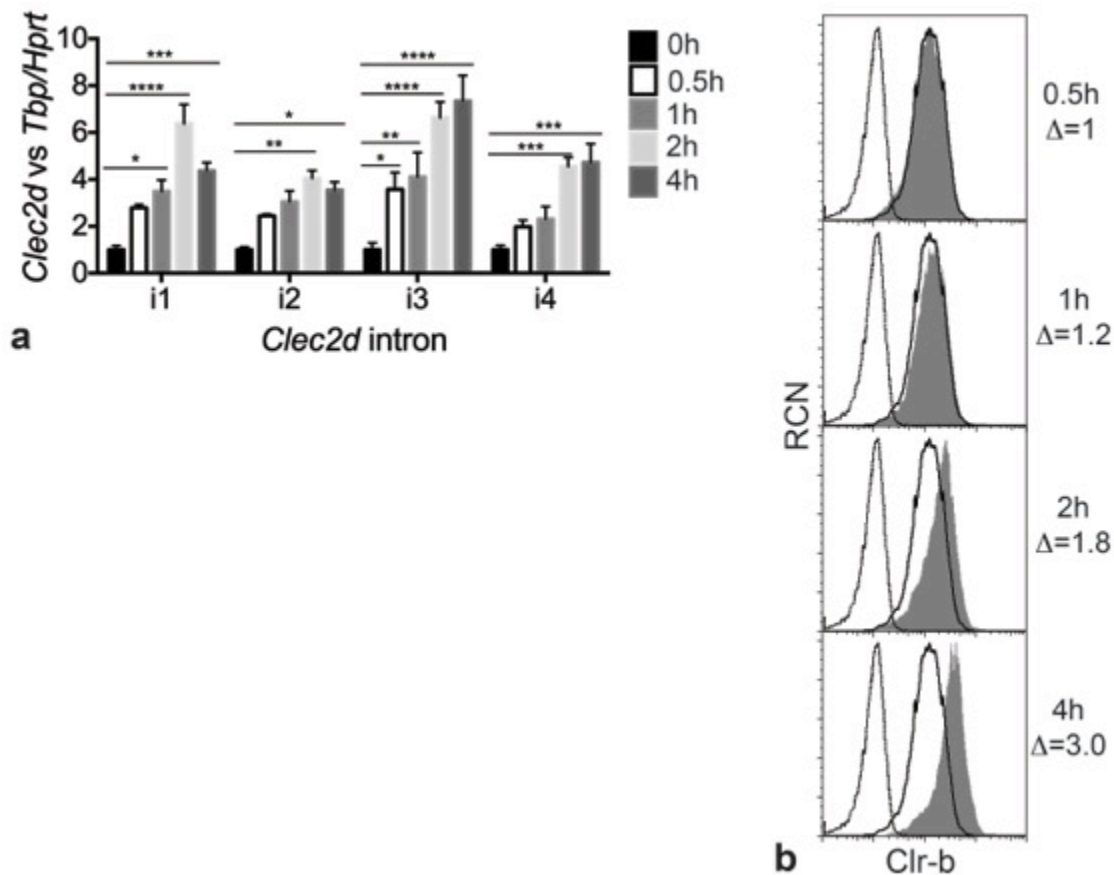

**Supp. Fig. 3.** Time course of Clr-b nascent transcript and protein levels during IFN treatment. NIH3T3 cells were seeded and treated with  $10^3$  U/mL IFN- $\alpha$ 4 for the indicated times. **(a)** Cells were analyzed for *Clec2d* nascent transcript expression relative to *Tbp* and *Hpirt* by qRT-PCR. N=4, significance determined by ANOVA with Bonferroni multiple comparisons test. **(b)** Representative flow cytometry histograms showing Clr-b expression on cells from (a). Histograms represent the median fluorescent intensity of the staining with secondary reagent only (dashed line), untreated (solid black line), and IFN-treated (shaded) cells.  $\Delta$  represents the fold change in Clr-b expression between the treated and untreated cells. Representative of 4 independent experiments.

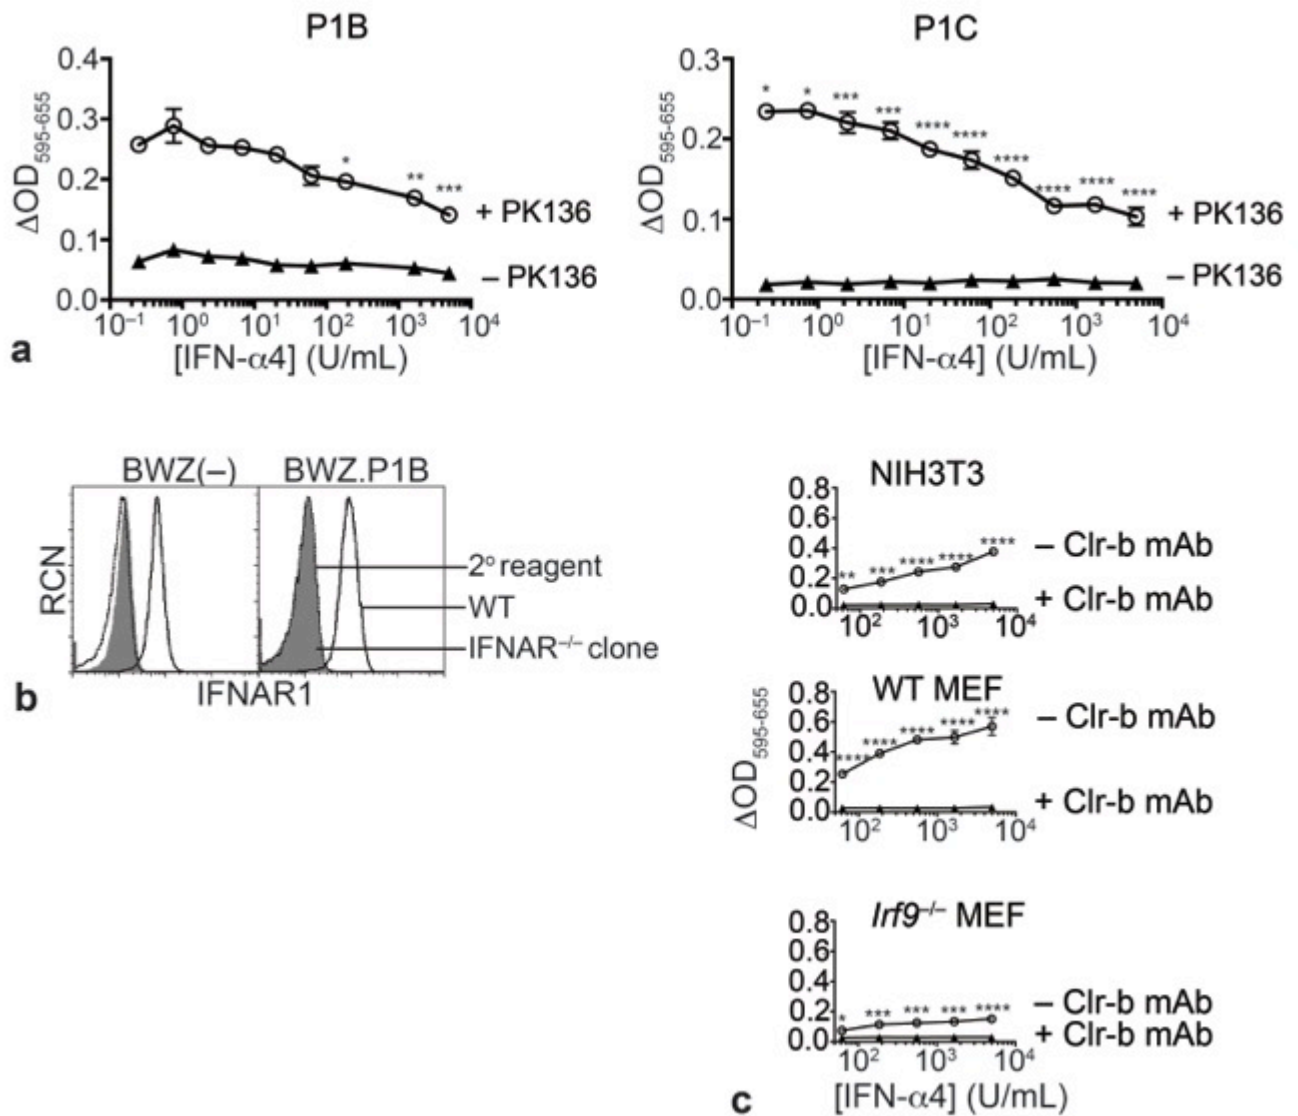

**Supp. Fig. 4.** BWZ.CD3 $\zeta$ /NKR-P1 (BWZ.P1) reporter cell analysis of NKR-P1 receptor and Clr-b ligand function. **(a)** Plate-bound PK136 (NK1.1) stimulation of BWZ.P1B and BWZ.P1C reporter cells in the presence of increasing IFN. Graphs show mean  $\pm$  SEM and ANOVA statistical analysis compared to no interferon treatment (not shown). **(b)** BWZ(-) and BWZ.P1B reporter cells were engineered using CRISPR/Cas9 gene editing technology to be genetically devoid of IFNAR1 surface expression. Histograms represent the median fluorescent intensity of the staining with secondary reagent only (dashed line), WT BWZ reporter cells (solid black line), and IFNAR1<sup>-/-</sup> BWZ CRISPR clone 7.1 (shaded) cells. **(c)** IFNAR1<sup>-/-</sup> BWZ.CD3 $\zeta$ /NKR-P1B reporter cell analysis of ligand expression on IFN- $\alpha 4$ -treated fibroblasts. NIH3T3 and MEF cells were used as stimulator cells upon co-culture with BWZ reporter cells in various concentrations of IFN- $\alpha 4$ . Graphs show mean  $\pm$  SEM.
